# Supplementary material for: RIG-I Self-Oligomerization Is Either Dispensable or Very Transient for Signal Transduction
Source: PubMed Central journal article supplement (PMC4178188; doi:10.1371/journal.pone.0108770), 2014-09-26
Supplement: pone.0108770.s001.pdf [file pone.0108770.s001.pdf]

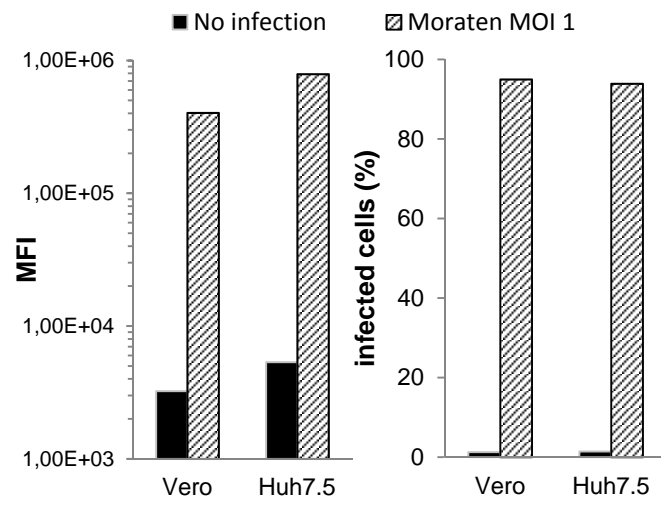

**Figure S1**

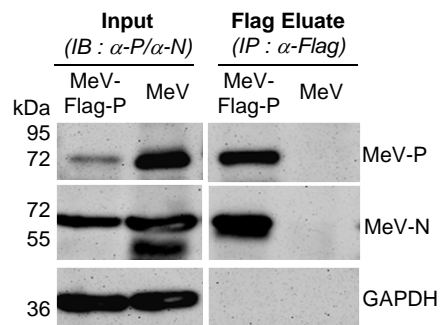

**Figure S2**

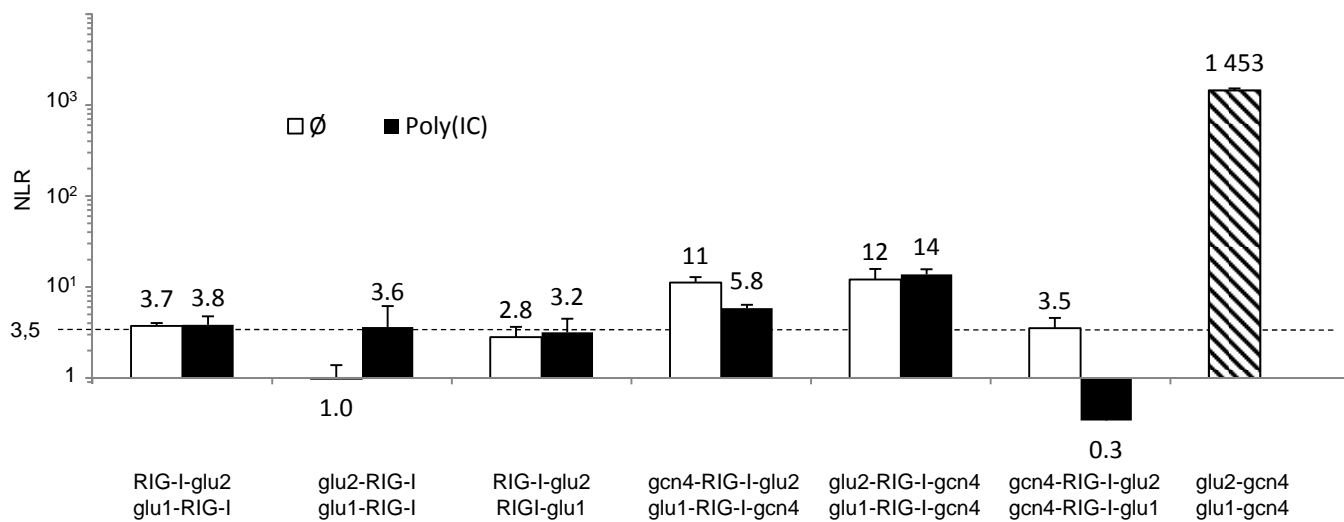

**Figure S3**

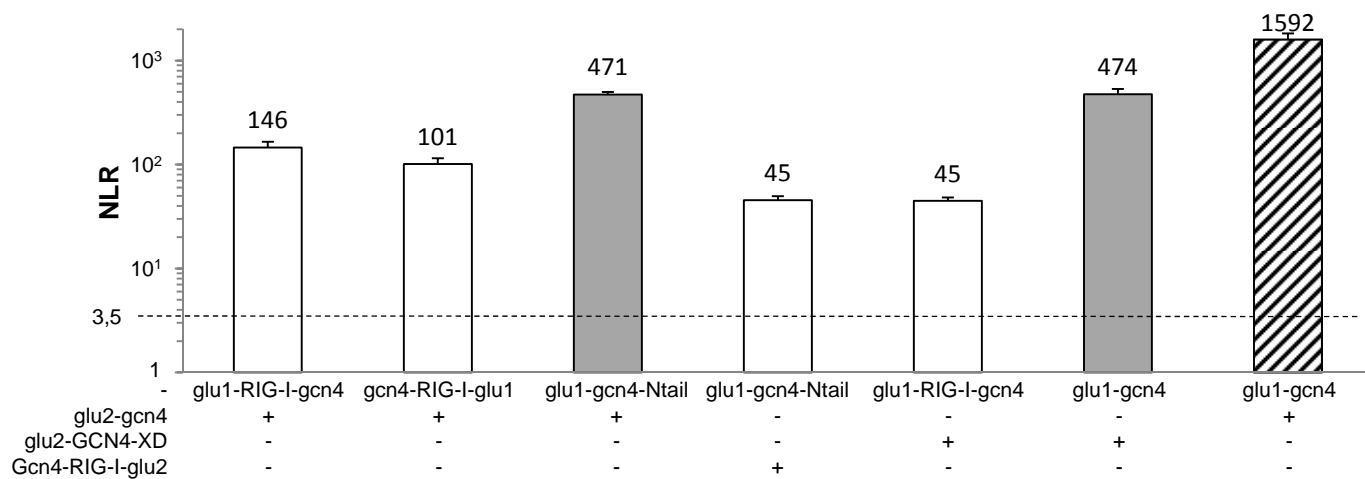

**Figure S4**
